# Supplementary material for: Melatonin controls microbiota in colitis by goblet cell differentiation and antimicrobial peptide production through Toll-like receptor 4 signalling
Source: PubMed Central journal article supplement (PMC7010660; doi:10.1038/s41598-020-59314-7), 2020-02-10
Supplement: 41598_2020_59314_MOESM1_ESM.pdf [file 41598_2020_59314_MOESM1_ESM.pdf]

**Title:** Melatonin controls microbiota in colitis through Toll-like receptor 4 signalling

Seung Won Kim,<sup>1,2,3</sup> Soochan Kim,<sup>1,3</sup> Mijeong Son,<sup>1,2,3</sup> Jae Hee Cheon,<sup>1,2,3</sup> and Young Sook Park<sup>4</sup>

<sup>1</sup>Department of Internal Medicine and Institute of Gastroenterology, Yonsei University College of Medicine, Seoul, Korea

<sup>2</sup>Brain Korea 21 PLUS Project for Medical Science, Yonsei University College of Medicine, Seoul, Korea

<sup>3</sup>Severance Biomedical Science Institute, Yonsei University College of Medicine, Seoul, Korea

<sup>4</sup>Department of Internal Medicine, Eulji Hospital, Eulji University School of Medicine, Seoul, Korea

## Supporting Information

### Supplementary Figures

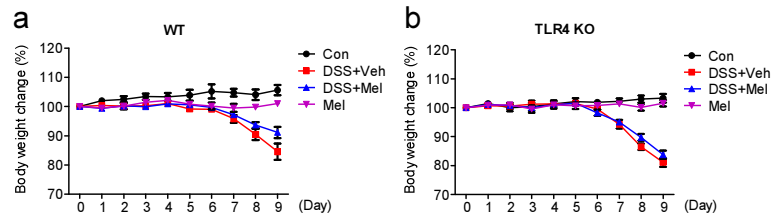

**Fig. S1.** Body weight changes. Wild type (**a**) and TLR4 knockout (**b**) mice were administered 2.5% DSS in drinking water and treated i.p. with 0.25% EtOH/PBS (Veh) or melatonin (Mel, 10 mg/kg/day) from days 1 to 8. Con, untreated control; Mel, melatonin-treated; TLR4 KO, TLR4 knockout mice; Veh, vehicle-treated; WT, wild-type mice.

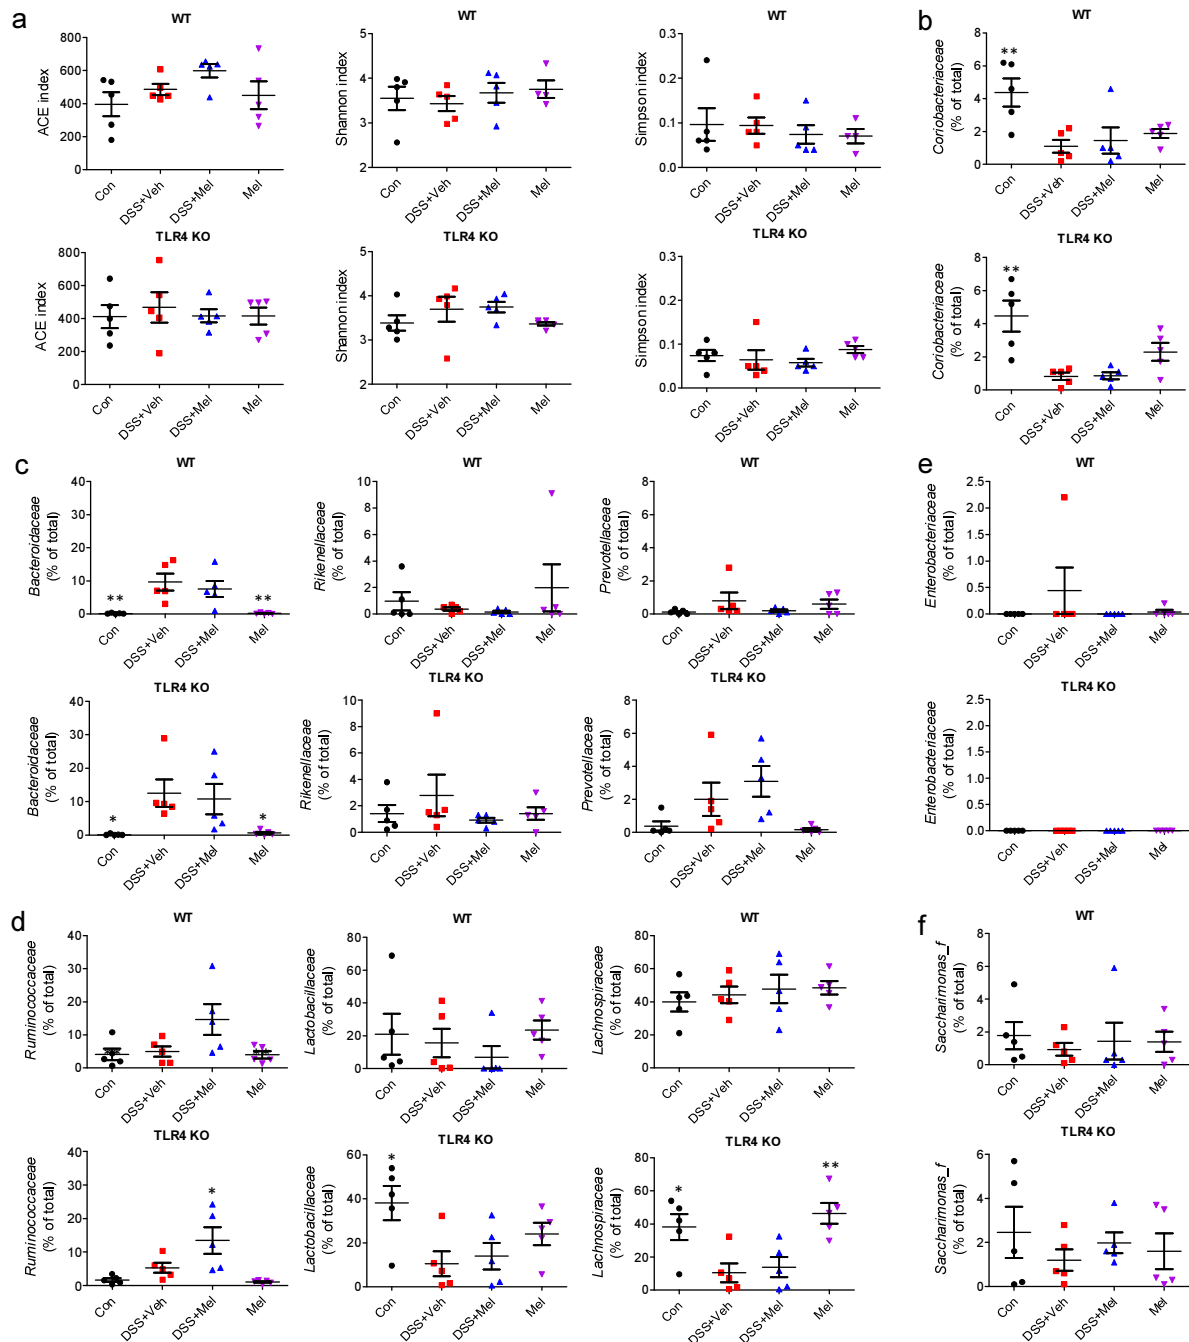

**Fig. S2. Melatonin suppresses dysbiosis of gut microbiome through TLR4 signal pathway.** Fecal microbiome composition in colons of wild type and TLR4 knockout mice was generated using 16S rRNA sequencing. **(a)** Richness and diversity were predicted by ACE, Shannon index, and Simpson index. **(b–f)** Microbiota profiles in family level belong to phylum *Actinobacteria* **(b)**, *Bacteroidetes* **(c)**, *Firmicutes* **(d)**, *Proteobacteria* **(e)**, and *Saccharibacteria TM7* **(f)**. Data represent mean  $\pm$  S.E.M. (n = 5). \* $P < 0.05$ , \*\* $P < 0.01$ . Con, untreated control; Mel, melatonin-treated; TLR4 KO, TLR4 knockout mice; Veh, vehicle-treated; WT, wild-type mice.

1<sup>st</sup> animal set (1)

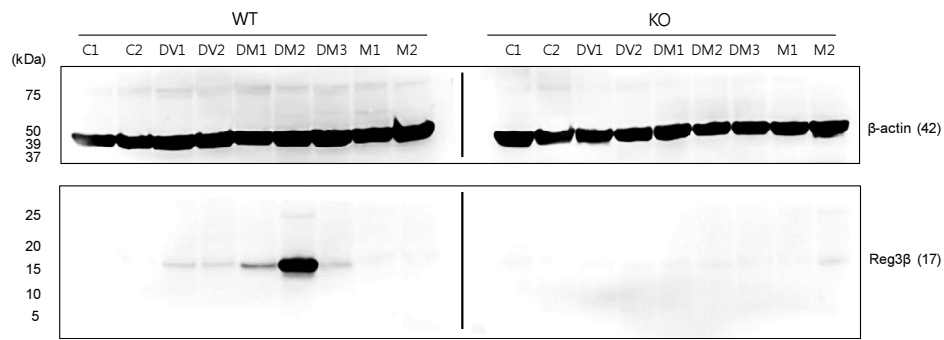

1<sup>st</sup> animal set (2)

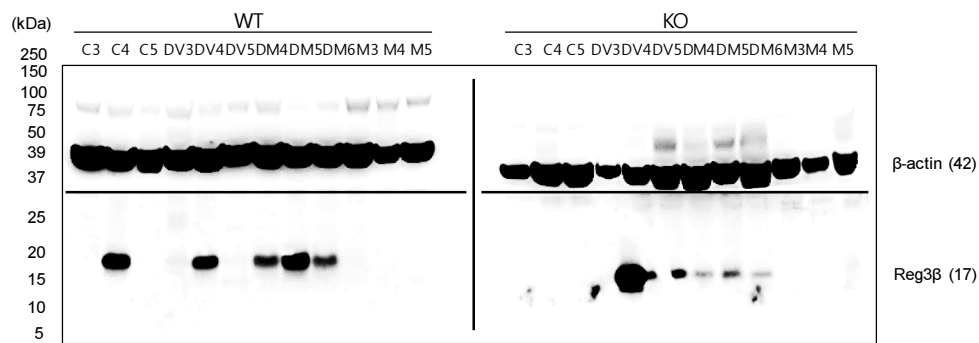

2<sup>nd</sup> animal set

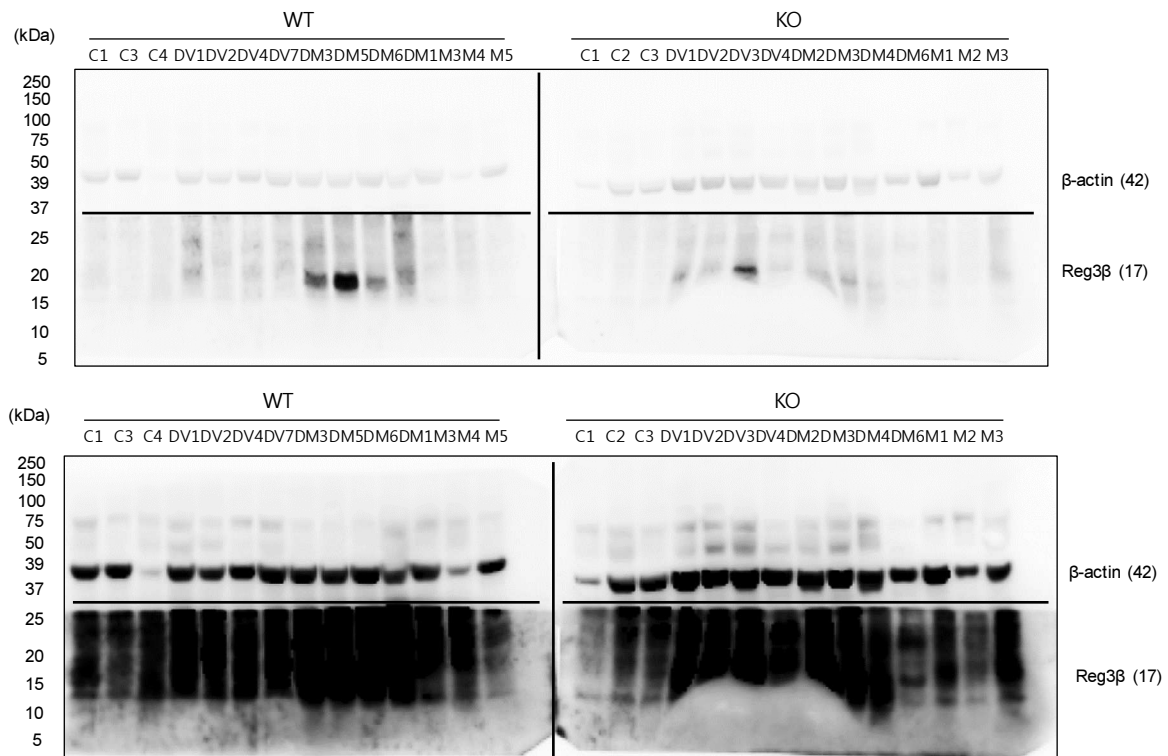

**Fig. S3. Full image of representative western blot for Reg3β in colon lysates of WT and TLR4 KO mice.**

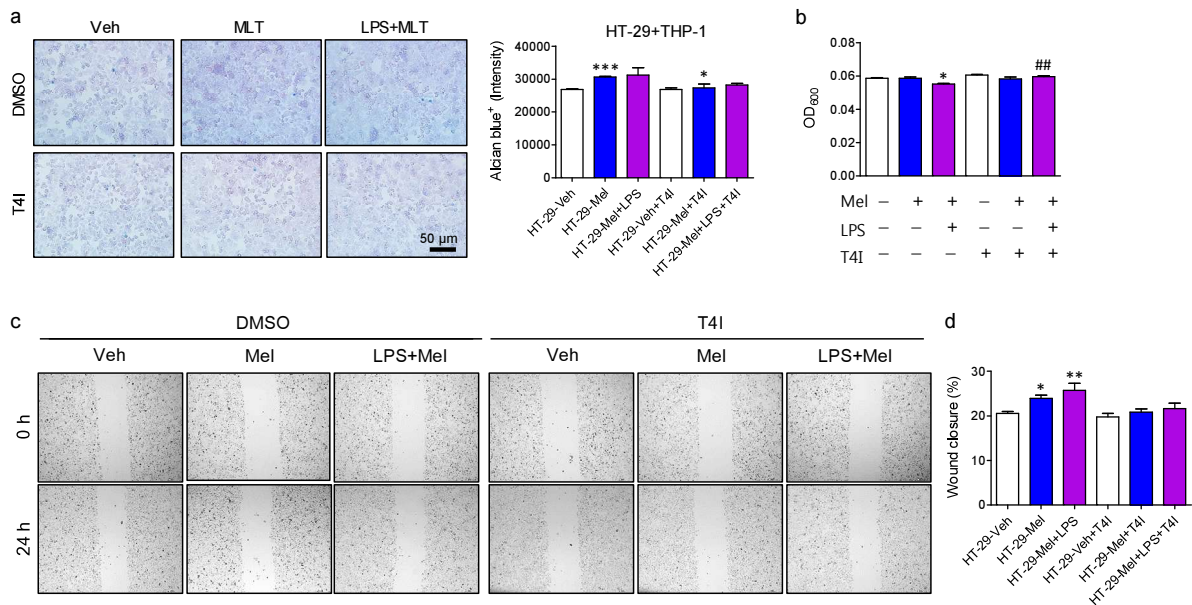

**Fig. S4. Melatonin controls Gram-negative bacteria by goblet cell differentiation and antimicrobial peptide production through TLR4 signal pathway independently of macrophage cells.** HT-29 cells were co-cultured with differentiated THP-1 cells and treated with vehicle (Veh) or melatonin (Mel) with or without TLR4 inhibitor (T4I) for 48 h. **(a)** Representative image of Alcian blue stain (left) and densitometry analysis (right). Data represent means  $\pm$  S.E.M. of 2 independent experiments. **(b)** Antimicrobial activity of melatonin-treated cells. *Escherichia coli* ( $OD_{600} = 0.5$ ) grown in LB broth were treated with culture media from HT-29 cells, which were co-cultured with THP-1 cells and incubated for 48 h. Optical density ( $OD_{600}$ ) of *E. coli* culture was measured. Data represent means  $\pm$  S.E.M. of 4 independent experiments. **(c)** Representative image of wound healing assay. **(d)** Wound closure rate. Wound closure rate was assessed by measuring wound area using Image J. Data represent mean  $\pm$  S.E.M. of 2 independent experiments. \* $P < 0.05$ , \*\* $P < 0.01$ , \*\*\* $P < 0.001$ , \*\*\*\* $P < 0.0005$ , ## $P < 0.01$  vs. DMSO. DMSO, dimethyl sulfoxide-treated; LPS, lipopolysaccharide-treated, Mel, melatonin-treated; T4I, TLR4 inhibitor-treated; Veh, vehicle-treated.

## Supplementary Table

**Table S1. List of primers used for qRT-PCR**

| Gene           | Sequence (5'–3')                                           |
|----------------|------------------------------------------------------------|
| <b>Human</b>   |                                                            |
| <i>MUC2</i>    | F: AGGATGACACCATCTACCTCACC<br>R: GGTGTAGGCATCGCTCTTCTC     |
| <i>MTNR1A</i>  | F: TGTCGATATTTAACAACGGGTGG<br>R: CGATGCCGGTGATGTTGAA       |
| <i>MTNR1B</i>  | F: GCATGGCCTACCACCGAATC<br>R: AATAGATGCGTGGGTCTACT         |
| <i>REG3G</i>   | F: CTCCCTGGTGAGGAGCATT<br>R: GCAGACATAGGGTAACTTTGC         |
| <i>CAMP</i>    | F: AGGATTGTGACTTCAAGAAGGACG<br>R: GTTTATTTCTCAGAGCCCAGAAGC |
| <i>DEFA3</i>   | F: CATGGGACGAAAGCTTGGCT<br>R: TGCAGGTTCCATAGCGACGTT        |
| <i>β-ACTIN</i> | F: CTCTTCCAGCCTTCCTTCCTG<br>R: CAGCACTGTGTTGGCGTACAG       |
| <b>Mouse</b>   |                                                            |
| <i>β-actin</i> | F: CATCTTCACCGTTCCAGT<br>R: GTCCACCTTCCAGCAGAT             |
| <i>Il1b</i>    | F: GCAACTGTTCTGAACTCAACT<br>R: ATCTTTTGGGGTCCGTCAACT       |
| <i>Tnfa</i>    | F: CAAAGGGAGAGTGGTCAGGT<br>R: ATTGCACCTCAGGGAAGAGT         |
| <i>Il22</i>    | F: GGCCAGCCTTGCAGATAACA<br>R: GCTGATGTGACAGGAGCTGA         |
| <i>Cramp</i>   | F: GCACGCTGACACCACTACC<br>R: CGGGCTATTCCCTGTCCAC           |
| <i>Il10</i>    | F: GCCACATGCTCCTAGAGCTG<br>R: CAGCTGGTCCTTTGTTTGAAA        |

---

|               |                                                         |
|---------------|---------------------------------------------------------|
| <i>Il17A</i>  | F: CAGGACGCGCAAACATGA<br>R: GCAACAGCATCAGAGACACAGAT     |
| <i>Mtnr1a</i> | F: TGTCAGCGAGCTGCTCAATG<br>R: GGTACACAGACAGGATGACCA     |
| <i>Mtnr1b</i> | F: GAACAGCTCAATCCCTAACTGC<br>R: ACGACTACTGTAGATAGCATGGG |
| <i>Reg3b</i>  | F: TGGGAATGGAGTAACAATG<br>R: GGCAACTTCACCTCACAT         |
| <i>Defa3</i>  | F: TCCTCCTCTCTGCCCTYGTCTG<br>R: AGACACAGCCTGGTCSTCTTCC  |
| <i>Defa4</i>  | F: CACCGCAATCGAAGGCTTG<br>R: ACAGTAGGCAATCCATACCCAC     |

---

**F:** forward primer, **R:** reverse primer
